# Supplementary material for: Assessment of Citizens’ Perception of the Built Environment throughout Digital Platforms: A Scoping Review
Source: MDPI journal article supplement (doi:10.3390/urbansci6030046), 2022-07-06
Supplement: s1 [file s1]

Archive with 3 entries (3 files):
- PRISMA-ScR-Fillable-Checklist_DelpinoChamy.pdf
- selected articles_spreadsheet_Delpino-Chamy Perez-Albert.xlsx
- urbansci-1690684-graphical (3).jpg
