# Supplementary material for: Assessment of Citizens’ Perception of the Built Environment throughout Digital Platforms: A Scoping Review
Source: MDPI journal article supplement (doi:10.3390/urbansci6030046), 2022-07-06
Supplement: s1 [file s1 › selected articles_spreadsheet_Delpino-Chamy Perez-Albert.xlsx]

## Sheet: PAPERS
REFERENCE	CODIGO	AUTORES	AÑO	TITULO	REVISTA	Columna2
[6]	1	Mackerron, Mourato	2013	Happiness is greater in natural environments	Global Environmental Change
[3]	2	Kyttä, Broberg, Haybatollahi	2016	Urban happiness : context-sensitive study of the social sustainability of urban settings	Environment and Planning B: Planning and Design
[31]	3	Samuelsson, Giusti, Peterson, Legeby, Brandt, Barthel	2018	Impact of environment on people's everyday experiences in Stockholm	Landscape and Urban Planning
[33]	4	Jose, R., Wade, R., Jefferies, C.	2015	Smart SUDS: Recognising the multiple-benefit potential of sustainable surface water management systems	Water Science and Technology
[37]	5	Chrisinger, King	2018	Stress experiences in neighborhood and social environments ( SENSE ): a pilot study to integrate the quantified self with citizen science to improve the built environment and health	International Journal of Health Geographics
[39]	6	Laatikainen, Hasanzadeh, Kyttä	2018	Capturing exposure in environmental health research: Challenges and opportunities of different activity space models	International Journal of Health Geographics
[20]	7	Katapally, Bhawra, Leatherdale, Ferguson, Longo,Rainham, Larouche, Osgood	2018	The SMART Study, a Mobile Health and Citizen Science Methodological Platform for Active Living Surveillance, Integrated Knowledge Translation, and Policy Interventions: Longitudinal Study	Journal of Medical Internet Research
[16]	8	Laatikainen, Broberg, Kyttä	2017	The physical environment of positive places: Exploring differences between age groups	Preventive Medicine
[28]	9	Besenyi GM, Diehl P, Schooley B, Turner-McGrievy BM, Wilcox S, Stanis SA, Kaczynski AT.	2016	Development and testing of mobile technology for community park improvements: validity and reliability of the eCPAT application with youth	Translational Behavioral Medicine
[29]	10	Osborne, N., Hawthorne, T.L., Dai, D., Fuller, C.H., Stauber, C	2018	Mapping the hidden hazards: Community-led spatial data collection of street-level environmental stressors in a degraded, urban watershed	International Journal of Environmental Research and Public Health
[34]	11	Jelokhani-Niaraki, M., Hajiloo, F., Samany, N.N.	2019	A Web-based Public Participation GIS for assessing the age-friendliness of cities: A case study in Tehran, Iran	Cities
[38]	12	McEwan, K., Richardson, M., Sheffield, D., Ferguson, F.J., Brindley, P.	2019	A smartphone app for improving mental health through connecting with urban nature	International Journal of Environmental Research and Public Health
[30]	13	Remigio, R.V., Zulaika, G., Rabello, R.S., Bryan, J., Sheehan, D.M., Galea, S., Carvalho, M.S., Rundle, A., Lovasi, G.S.	2019	A Local View of Informal Urban Environments: a Mobile Phone-Based Neighborhood Audit of Street-Level Factors in a Brazilian Informal Community	Journal of Urban Health
[19]	14	Kijewski-Correa, T., Roueche, D.B., Mosalam, K.M., Prevatt, D.O., Robertson, I.	2021	StEER: A Community-Centered Approach to Assessing the Performance of the Built Environment after Natural Hazard Events	Frontiers in Built Environment
[5]	15	Fuller, D., Bell, S., Firth, C.L., Muhajarine, N., Nelson, T., Stanley, K., Sones, M., Smith, J., Thierry, B., Laberee, K., Stephens, Z.P., Phillips, K., Kestens, Y., Winters, M.	2021	Wave 1 results of the INTerventions, Research, and Action in Cities Team (INTERACT) cohort study: Examining spatio-temporal measures for urban environments and health	Health and Place
[32]	16	Szarek-Iwaniuk, P., Senetra, A.	2020	Access to ICT in Poland and the co-creation of Urban space in the process of modern social participation in a smart city-a case study	Sustainability
[1]	17	Saadallah, D.M.	2020	Utilizing participatory mapping and PPGIS to examine the activities of local communities	Alexandria Engineering Journal
[4]	18	Rydenstam, T., Fell, T., Buli, B.G., King, A.C., Bälter, K.	2020	Using citizen science to understand the prerequisites for physical activity among adolescents in low socioeconomic status neighborhoods - The NESLA study	Health and Place
[21]	19	Kajosaari, Laatikainen	2020	Adults ’ leisure ‑ time physical activity and the neighborhood built environment : a contextual perspective	International Journal of Health Geographics
[35]	20	Orrù, A.M.	2015	Extracting Urban Food Potential: Design-based methods for digital and bodily cartography	Future of Food: Journal on Food, Agriculture and Society
[8]	21	Wannemacher, K., Birli, B., Sturn, T., Stiles, R., Moorthy, I., See, L., Fritz, S.	2018	Using citizen science to help monitor urban landscape changes and drive improvements	GI_Forum

## Sheet: Teoria
TEORIA
	CODIGO	COUNTRIES		CODIGO	# CITIES		CODIGO	CITIES		CODIGO	STUDY FIELD		CODIGO	THEORETICAL APPROACH		CODIGO	OBJECT OF STUDY		CODIGO	STUDY APPLICATION		CODIGO	METHODOLOGICAL APPROACH FOR COLLECTING DATA		CODIGO	METHOD		CODIGO	PLACE STUDIED		CODIGO	SCALE STUDIED
	1	UK		1	many		1	All		1	Urban Environment & well-being		1	Subjective well-being (SWB)		1	Happiness		1	Built vs Natural environment		1	Citizens Science		1	App		1	Green Open Spaces vs Urban Areas		1	City
	2	Finland		2	1		2	Helsinki		2	Urban Environment & well-being		2	Subjective well-being (SWB)		2	Wellbeing		2	Urban structural characteristics		2	Place-based		2	PPGIS		2	Urban vs Suburban		2	Neighbourhood
	3	Sweden		3	1		3	Stockholm					2	Social sustainability		2			2			2			3	PPGIS		3	Urban Environment		3	City
	4	Scotland		4	1		4	Dundee		3	Urban Environment & well-being		3	Subjective well-being (SWB)		3	Positive/Negative experiences		3	Environmental features		3	Place-based (not declared)		4	PPGIS		4	Green Open Spaces		4	Project
	5	USA		5	1		5	San Francisco					3	Social sustainability (not declared)		3			3			3			5	App		5	Urban Environment		5	Street
	6	Finland		5	1		6	Helsinki					3	Transactional person–environment (not declared)		3			3			3			5	Biometrics		6	Neighbourhood		6	Metropolitan
	7	Canada		6	1		7	Regina		4	Greenery		4	Public Participation		4	Cultural Ecosystem Services		4	SUDS		4	Participatory mapping (not declared)		6	PPGIS		7	Neighbourhood		7	Neighbourhood
	8	Finland		7	2		7	Saskatoon		5	Urban Environment & well-being		5	Subjective well-being (SWB)		5	Wellbeing		5	Environmental features		5	Quantified self		6	PPGIS		8	Urban Environment		8	Metropolitan
	9	USA		8	2		8	Helsinki					5	Biological responses to built environments		5			5			5	Citizens Science		7	App		9	Green Open Spaces		9	Project
	10	USA		9	1		8	Espoo		6	Urban Environment & well-being		6	Subjective well-being (SWB)		6	Activity Space		6	Methodological		6	Place-based		8	PPGIS		10	Blue Spaces		10	Street
	11	Iran		10	1		9	Greenville County					6	Social sustainability (not declared)		6			6			6			9	App		11	Urban Environment		11	City
	12	UK		11	1		10	Atlanta		7	Urban Environment & well-being		7	Subjective well-being (SWB)		7	Active living		7	Surveillance		7	Citizens Science		10	App		12	Built vs Natural environment		12	City
	13	Brazil		12	1		11	Tehran					7	Urban Health & Physical Activity (PA)		7			7			7			11	PPGIS		13	Informal neighbourhoods		13	Street
	14	USA		13	1		12	Sheffield		8	Urban Environment & well-being		8	Transactional person–environment		8	Positive/Negative experiences		8	Age groups		8	Place-based		11	Multicriteria Decision Analysis (MCDA)		14	Hazards		14	City
	15	Canada		14	4		13	Rio de Janeiro		9	Urban Environment & well-being		9	Audit Tool		9	PA		9	Age groups (youth)		9	Systematic social observation (SSO) / observational environmental data collection tool		12	App		15	Greenways		15	Project
	16	Poland		15	4		14						9	Public Participation (called Participatory Action Research PAR)		9			9			9			13	App		16	City		16	City
	17	Egypt		16	1		15						9	Urban Health & Physical Activity (PA)		9			9			9			14	App		17	Neighbourhood		17	Neighbourhood
	18	Sweden		17	1		16	Olsztyn		10	Urban Environment & well-being		10	Audit tool		10	Environmental hazards		10	Watershed		10	Citizens Science / community-based participatory research (CBPR)		15	App		18	Neighbourhood		18	Neighbourhood
	19	Finland		18	1		17	Alexandria					10			10			10			10	Systematic social observation (SSO)		15	PPGIS		19			19	Metropolitan
	20	Sweden		19	1		18			11	Urban Environment & well-being		11	Public Participation (not declared)		11	Age friendliness		11	Environmental features		11	Citizens Science (not declared)		15	Biometrics		20	Green Open Spaces		20	City
	21	Austria		20	1		19	Helsinki		12	Urban Environment & well-being		12	Subjective well-being (SWB)		12	Wellbeing		12	Built vs Natural environment		12	Positive psychology intervention		16	Semi-structured interview		21	Green Open Spaces		21	Project
				21	1		20	Stockholm					12			12			12	Improve mental health		12			17	PPGIS
							21	Viena		13	Urban Environment & well-being		13	Audit tool		13	Informal neighbourhoods		13	Environmental features		13	Systematic social observation (SSO)		18	App
										14	Resilience		14	Audit tool		14	Environmental hazards		14	Hazards assessment		14	Systematic social observation (SSO)		19	PPGIS
										15	Urban Environment & well-being		15	Subjective well-being (SWB)		15	PA		15	Urban Project (greenways)		15	Citizens Science (not declared)		20	App
													15	Urban Health & Physical Activity (PA)		15			15			15	Quantified self		21	App
										16	Information and Communication Technology		16	Public Participation		16	e-participation		16	Smart Cities		16	Interview
										17	Neighbourhood character (sense of community)		17	Public Participation		17	Sense of community		17	Community activities		17	Participatory mapping
													17			17			17			17	Place-based
										18	Urban Environment & well-being		18	Urban Health & Physical Activity (PA)		18	PA		18	Environmental features		18	Citizens Science
													18			18			18	Age groups (youth)		18
										19	Urban Environment & well-being		19	Urban Health & Physical Activity (PA)		19	PA		19	Environmental features		19	Participatory mapping
													19	Social sustainability (not declared)		19			19			19
										20	Urban Environment & well-being		20	Public Participation (not declared)		20	Urban Agriculture		20	Critical Cartography		20	Participatory mapping
										21	Neighbourhood character (sense of community)		21	Public Participation (not declared)		21	Positive/Negative experiences		21	Quality of Green Open Spaces		21	Citizens Science
										21	Urban Environment & well-being

## Sheet: General Data
									1	Peterson
Paper	Year	Country	Journal						1	Wade		Etiquetas de fila	Cuenta de 1																																Etiquetas de fila	Cuenta de Paper
1	2013	UK	Global Environmental Change						1	Mourato		Bälter	1		Broberg	2																													Austria	1
2	2016	Finland	Environment and Planning B: Planning and Design						1	Broberg		Barthel	1		Ferguson	2																													Brazil	1
3	2018	Sweden	Landscape and Urban Planning						1	Brandt		Bell	1		King	2																													Canada	2
4	2015	Scotland	Water Science and Technology						1	Jefferies		Bhawra	1		Kyttä	3																													Egypt	1
5	2018	USA	International Journal of Health Geographics						1	Haybatollahi		Birli	1		Laatikainen	3																													Finland	4
6	2018	Finland	International Journal of Health Geographics						1	Giusti		Brandt	1		Bälter	1																													Iran	1
7	2018	Canada	Journal of Medical Internet Research						1	Longo		Brindley	1		Barthel	1																													Poland	1
8	2017	Finland	Preventive Medicine						1	Legeby		Broberg	2		Bell	1																													Scotland	1
9	2016	USA	Translational Behavioral Medicine						1	Wilcox S		Bryan	1		Bhawra	1																													Sweden	3
10	2018	USA	International Journal of Environmental Research and Public Health						1	Dai		Buli	1		Birli	1																													UK	2
11	2019	Iran	Cities						1	Samany		Carvalho	1		Brandt	1																													USA	4
12	2019	UK	International Journal of Environmental Research and Public Health						1	Sheffield		Dai	1		Brindley	1																													Total general	21
13	2019	Brazil	Journal of Urban Health						1	Rabello		Diehl P	1		Bryan	1
14	2021	USA	Frontiers in Built Environment						1	Mosalam		Fell	1		Buli	1
15	2021	Canada	Health and Place						1	Firth		Ferguson	2		Carvalho	1																	M.
16	2020	Poland	Sustainability						1	King		Firth	1		Dai	1
17	2020	Egypt	Alexandria Engineering Journal						1	Hasanzadeh		Fritz	1		Diehl P	1
18	2020	Sweden	Health and Place						1	Buli		Fuller	1		Fell	1
19	2020	Finland	International Journal of Health Geographics						1	Bhawra		Galea	1		Firth	1
20	2015	Sweden	Future of Food: Journal on Food, Agriculture and Society						1	Broberg		Giusti	1		Fritz	1
21	2018	Austria	GI_Forum						1	Sturn		Hajiloo	1		Fuller	1
									1	Diehl P		Hasanzadeh	1		Galea	1
									1	Mackerron		Hawthorne	1		Giusti	1
									1	Kyttä		Haybatollahi	1		Hajiloo	1
									1	Samuelsson		Jefferies	1		Hasanzadeh	1
									1	Jose		Kaczynski AT.	1		Hawthorne	1
									1	Chrisinger		Kestens	1		Haybatollahi	1
									1	Laatikainen		King	2		Jefferies	1
									1	Katapally		Kyttä	2		Kaczynski AT.	1
									1	Laatikainen		Laatikainen	1		Kestens	1
									1	Besenyi GM		Laberee	1
									1	Osborne		Larouche	1		Laberee	1
									1	Jelokhani-Niaraki		Leatherdale	1		Larouche	1
									1	McEwan		Legeby	1		Leatherdale	1
									1	Remigio		Longo	1		Legeby	1
									1	Kijewski-Correa		Lovasi	1		Longo	1
									1	Fuller		Moorthy	1		Lovasi	1
									1	Szarek-Iwaniuk		Mosalam	1		Moorthy	1
									1	Saadallah		Mourato	1		Mosalam	1
									1	Rydenstam		Muhajarine	1		Mourato	1
									1	Kajosaari		Nelson	1		Muhajarine	1
									1	Orrù		Osgood	1		Nelson	1
									1	Wannemacher		Phillips	1		Osgood	1
									1	Kyttä		Prevatt	1		Phillips	1
									1	Leatherdale		Rabello	1		Prevatt	1
	Etiquetas de fila	Cuenta de Paper							1	Kyttä		Richardson	1		Rabello	1
	2013	1							1	Schooley B		Robertson	1		Richardson	1
	2015	2							1	Hawthorne		Roueche	1		Robertson	1
	2016	2							1	Hajiloo		Rundle	1		Roueche	1
	2017	1							1	Richardson		Samany	1		Rundle	1
	2018	6							1	Zulaika		Schooley B	1		Samany	1
	2019	3							1	Roueche		See	1		Schooley B	1
	2020	4							1	Bell		Senetra	1		See	1
	2021	2							1	Senetra		Sheehan	1		Senetra	1
	Total general	21							1	Ferguson		Sheffield	1		Sheehan	1
									1	Turner-McGrievy BM		Smith	1		Sheffield	1
									1	Laatikainen		Sones	1		Smith	1
									1	Fell		Stanis SA	1		Sones	1
									1	Barthel		Stanley	1		Stanis SA	1
									1	Birli		Stauber	1		Stanley	1
									1	Kaczynski AT.		Stephens	1		Stauber	1
									1	Fuller		Stiles	1		Stephens	1
									1	Rainham		Sturn	1		Stiles	1
									1	Larouche		Thierry	1		Sturn	1
									1	Stanis SA		Turner-McGrievy BM	1		Thierry	1
									1	Ferguson		Wade	1		Turner-McGrievy BM	1
									1	Bryan		Wilcox S	1		Wade	1
									1	Prevatt		Winters	1		Wilcox S	1
									1	Muhajarine		Zulaika	1		Winters	1
									1	Brindley		Besenyi GM	1		Zulaika	1
									1	Sheehan		Chrisinger	1		Besenyi GM	1
									1	Robertson		Fuller	1		Chrisinger	1
									1	Nelson		Jelokhani-Niaraki	1		Fuller	1
									1	Stiles		Jose	1		Jelokhani-Niaraki	1
									1	King		Kajosaari	1		Jose	1
									1	Osgood		Katapally	1		Kajosaari	1
									1	Stauber		Kijewski-Correa	1		Katapally	1
									1	Bälter		Kyttä	1		Kijewski-Correa	1
									1	Moorthy		Laatikainen	2
									1	Galea		Mackerron	1		Mackerron	1
									1	Stanley		McEwan	1		McEwan	1
									1	See		Orrù	1		Orrù	1
									1	Carvalho		Osborne	1		Osborne	1
									1	Sones		Rainham	1		Rainham	1
									1	Fritz		Remigio	1		Remigio	1
									1	Rundle		Rydenstam	1		Rydenstam	1
									1	Smith		Saadallah	1		Saadallah	1
									1	Lovasi		Samuelsson	1		Samuelsson	1
									1	Thierry		Szarek-Iwaniuk	1		Szarek-Iwaniuk	1
									1	Laberee		Wannemacher	1		Wannemacher	1
									1	Stephens		Total general	95
									1	Phillips
									1	Kestens
									1	Winters

## Sheet: Theoretical
	Etiquetas de fila	Cuenta de CODIGO
	Audit Tool	4
	Biological responses to built environments	1
	Public Participation	3
	Public Participation (called Participatory Action Research PAR)	1
	Public Participation (not declared)	3
	Social sustainability	1
	Social sustainability (not declared)	3
	Subjective well-being (SWB)	8
	Transactional person–environment	1
	Transactional person–environment (not declared)	1
	Urban Health & Physical Activity (PA)	5
	(en blanco)
	Total general	31
	Audit Tool	4
	Public Participation	7
	Public Participation	3
	Public Participation (called Participatory Action Research PAR)	1
	Public Participation (not declared)	3
	Social sustainability	4
	Social sustainability	1
	Social sustainability (not declared)	3
	Subjective well-being (SWB)	8
	Transactional person–environment	2
	Transactional person–environment	1
	Transactional person–environment (not declared)	1
	Urban Health & Physical Activity (PA)	5
	Others	1
	Audit Tool	4
	Transactional person–environment	2
	Public Participation	7
	Social sustainability	4
	Subjective well-being (SWB)	8
	Urban Health & Physical Activity (PA)	5
	Others	1

## Sheet: Methodological
	Etiquetas de fila	Cuenta de CODIGO
	Citizens Science	5
	Citizens Science (not declared)	2
	Citizens Science / community-based participatory research (CBPR)	1
	Interview	1
	Participatory mapping	4
	Participatory mapping (not declared)	1
	Place-based	4
	Place-based (not declared)	1
	Positive psychology intervention	1
	Quantified self	2
	Systematic social observation (SSO)	2
	Systematic social observation (SSO) / observational environmental data collection tool	1
	Total general	25
	Citizens Science	8
	Citizens Science	5
	Citizens Science (not declared)	2
	Citizens Science / community-based participatory research (CBPR)	1
	Participatory mapping	5
	Participatory mapping	4
	Participatory mapping (not declared)	1
	Place-based	5
	Place-based	4
	Place-based (not declared)	1
	Systematic social observation (SSO)	3
	Systematic social observation (SSO)	2
	Systematic social observation (SSO) / observational environmental data collection tool	1
	Others	4
	Systematic social observation (SSO)	3
	Participatory mapping	5
	Place-based	5
	Citizens Science	8
	Others	4
