# Supplementary figures and images for: Assessment of Citizens’ Perception of the Built Environment throughout Digital Platforms: A Scoping Review
Source: MDPI journal article supplement (doi:10.3390/urbansci6030046), 2022-07-06

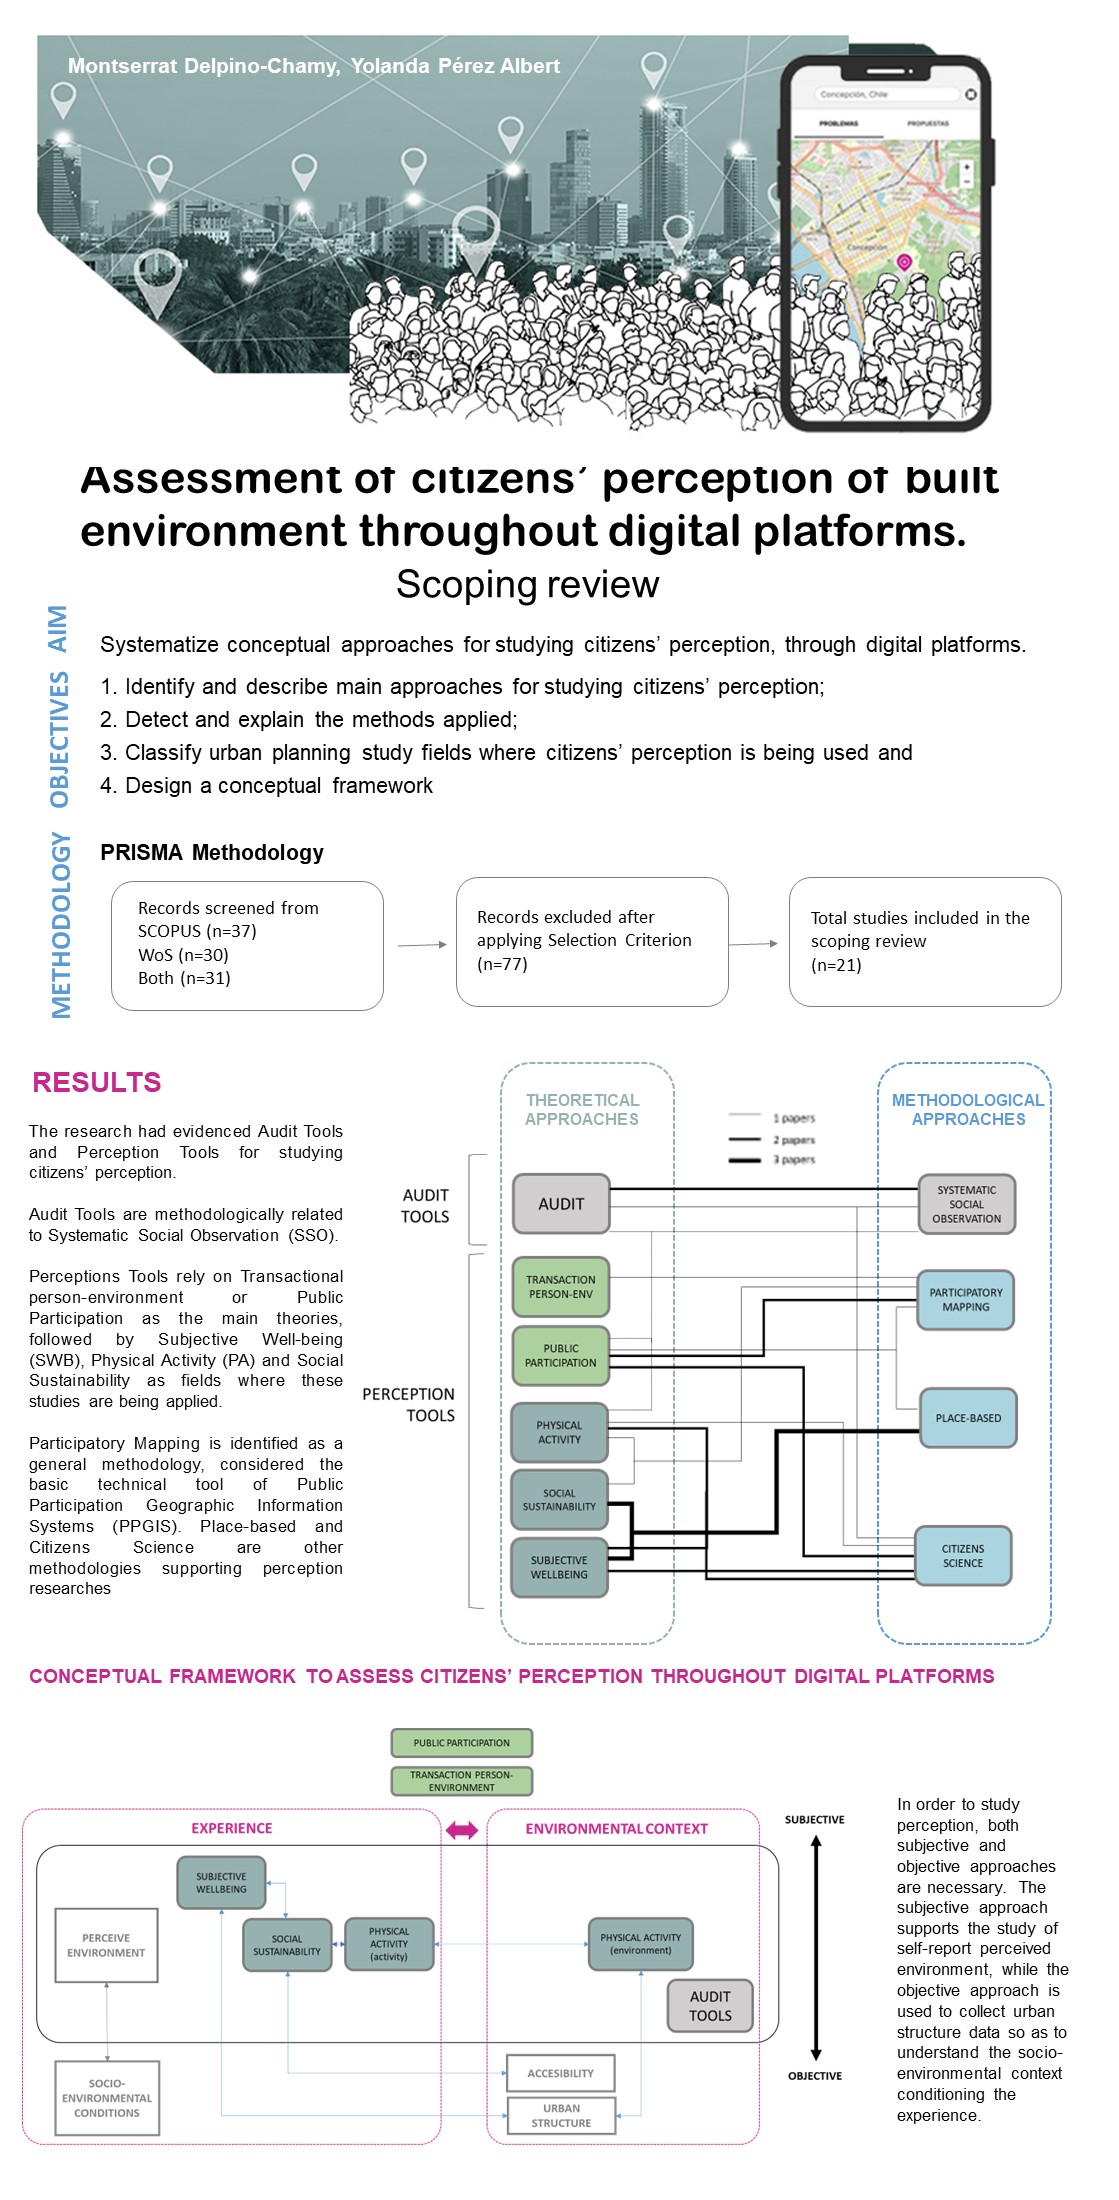

Supplement: s1 [file s1 › urbansci-1690684-graphical (3).jpg]
